# Supplementary material
Source: ML conference proceedings conference paper supplement (https://proceedings.neurips.cc/paper_files/paper/2023/hash/3e32af2df2cd13dfbcbe6e8d38111068-Abstract.html)
Supplement: Supplementary file 1 [file 3e32af2df2cd13dfbcbe6e8d38111068-Supplemental-Conference.pdf]

331 **A Trichotomy**  
 332 **for Transductive Online Learning**  
 333 **Supplementary Materials**

334 **A Multiclass Threshold Bounds**

335 **Definition A.1.** Let  $\mathcal{X}$  and  $\mathcal{Y}$  be sets, let  $X = \{x_1, \dots, x_t\} \subseteq \mathcal{X}$ , and let  $\mathcal{H} \subseteq \mathcal{Y}^{\mathcal{X}}$ . We say that  
 336  $X$  is *threshold-shattered* by  $\mathcal{H}$  if there exist distinct  $y_0, y_1 \in \mathcal{Y}$  and functions  $h_1, \dots, h_t \in \mathcal{H}$  such  
 337 that  $\overline{h_i(x_j)} = y_{\mathbb{1}(j \leq i)}$ . The *threshold dimension* of  $\mathcal{H}$ , denoted  $\text{TD}(\mathcal{H})$ , is the supremum of the set of  
 338 integers  $t$  for which there exists a *threshold-shattered* set of cardinality  $t$ .

339 We introduce the following generalization of the threshold dimension.

340 **Definition A.2.** Let  $\mathcal{X}$  and  $\mathcal{Y}$  be sets, let  $X = \{x_1, \dots, x_t\} \subseteq \mathcal{X}$ , and let  $\mathcal{H} \subseteq \mathcal{Y}^{\mathcal{X}}$ . We say that  $X$   
 341 is *multi-class threshold-shattered* by  $\mathcal{H}$  if there exist  $y_1, y'_1, \dots, y_t, y'_t \in \mathcal{Y}$  such that  $y_i \neq y'_j$  for all  
 342  $i, j \in [t]$ , and there exist functions  $h_1, \dots, h_t \in \mathcal{H}$  such that

$$h_i(x_j) = \begin{cases} y_i & (j \leq i) \\ y'_j & (j > i). \end{cases}$$

343 The *multi-class threshold dimension* of  $\mathcal{H}$ , denoted  $\text{MTD}(\mathcal{H})$ , is the supremum of the set of integers  $t$   
 344 for which there exists a *threshold-shattered* set of cardinality  $t$ .

345 **Claim A.3.** Let  $\mathcal{X}$  and  $\mathcal{Y}$  be sets,  $k = |\mathcal{Y}| < \infty$ , and let  $\mathcal{H} \subseteq \mathcal{Y}^{\mathcal{X}}$ . Then  $\text{TD}(\mathcal{H}) \geq \lfloor \text{MTD}(\mathcal{H})/k^2 \rfloor$ .  
 346 *Proof of Claim A.3.* The proof follows from two applications of the pigeonhole principle.  $\square$

347 **Claim A.4.** Let  $\mathcal{X}$  and  $\mathcal{Y}$  be sets, let  $\mathcal{H} \subseteq \mathcal{Y}^{\mathcal{X}}$  such that  $d = \text{TD}(\mathcal{H}) < \infty$ , and let  $n \in \mathbb{N}$ . Then

$$M(\mathcal{H}, n) \geq \min \{ \lfloor \log(d) \rfloor, \lfloor \log(n) \rfloor \}.$$

348 The proof of Claim A.4 is similar to that of Claim 3.4.

349 **Theorem A.5.** Let  $\mathcal{X}$  and  $\mathcal{Y}$  be sets with  $k = |\mathcal{Y}| < \infty$ , let  $\mathcal{H} \subseteq \mathcal{Y}^{\mathcal{X}}$ . If  $\text{LD}(\mathcal{H}) = \infty$  then  
 350  $\text{MTD}(\mathcal{H}) = \infty$ .

351 Following is a lemma from Ramsey theory used for proving Theorem A.5, and a generalized notion  
 352 of subtrees used in that lemma.

353 **Definition A.6.** Let  $X$  be a finite set and let  $(X, \preceq)$  be a partial order relation. For  $p, c \in X$ , we  
 354 say that  $c$  is a *child* of  $p$  if  $p \preceq c$  and there does not exist  $m \in X$  such that  $p \preceq m \preceq c$ . We say that  
 355  $z \in X$  is a *leaf* if there exists no  $x \in X$  such that  $z \preceq x$ .  $(X, \preceq)$  is a *binary tree* every non-leaf  
 356  $x \in X$  has precisely 2 children. The *depth* of  $z \in X$  is the largest  $d \in \mathbb{N}$  for which there exist  
 357 distinct  $x_1, \dots, x_d \in X$  such that  $x_1 \preceq x_2 \preceq \dots \preceq x_d \preceq z$ . For  $d \in \mathbb{N}$ , we say that  $(X, \preceq)$  is a  
 358 *complete binary tree of depth  $d$*  if  $(X, \preceq)$  is a binary tree and all the leaves in  $X$  have depth  $d$ . We say  
 359 that a partial order  $(X', \preceq')$  is a *subtree* of  $(X, \preceq)$  if  $X' \subseteq X$ , and  $\forall a, b \in X' : a \preceq' b \iff a \preceq b$ .

360 The following lemma follows from Lemma 16 in Appendix B of [ALMM19].

361 **Lemma A.7.** Let  $k, d \in \mathbb{N}$ , and let  $\mathcal{Y}$  be a set,  $|\mathcal{Y}| = k$ . Let  $T = (X, \preceq)$  be a complete binary tree  
 362 of depth  $d \in \mathbb{N}$ , and let  $g : X \rightarrow \mathcal{Y}$ . Then  $T$  has a monochromatic complete binary tree subtree  
 363  $T' = (X', \preceq')$  of depth  $d/k$ , namely there exists  $T'$  such that  $T'$  is a subtree of  $T$ ,  $T'$  is a complete  
 364 binary tree of depth  $d/k$ , and  $|g(X')| = |\{g(a) : a \in X'\}| = 1$ .

365 *Proof of Theorem A.5.* Let  $f_k(d)$  be the largest number such that every class with Littlestone dimen-  
 366 sion  $d$  has multi-class threshold dimension at least  $f_k(d)$ . We show by induction on  $d$  that  $f_k$  satisfies  
 367 the following recurrence relation:  $f_k(d) \geq 1 + f_k(\lceil d/k \rceil - 1)$ .

368 For the base case, if  $d = \text{LD}(\mathcal{H}) = 0$ ,  $\mathcal{H}$  and  $\mathcal{X}$  are non-empty and therefore  $\text{MTD}(\mathcal{H}) \geq 1$ . For  
 369 the induction step  $d = \text{LD}(\mathcal{H}) \geq 1$ , let  $T$  be a Littlestone tree of depth  $d$  that is shattered by  $\mathcal{H}$ . Let  
 370  $h \in \mathcal{H}$ . Then  $h$  is a  $k$ -cloring of the nodes of  $T$ . By Lemma A.7, there exists an  $h$ -monochromatic

371 subtree  $T' \subseteq T$  of depth at least  $d/k$ . Let  $y_1$  be the color assigned by  $h$  to all nodes of  $T'$ .  $T'$  is  
372 shattered by  $\mathcal{H}$ , so there exists a child  $x_1$  of the root  $r$  of  $T'$  such that the label of the edge leading  
373 to it is some  $y'_1 \neq y_1$ . Let  $\mathcal{H}_1 = \{h \in \mathcal{H} : h(x_1) = y'_1\}$ . Notice that  $\text{LD}(\mathcal{H}_1) \geq d/k - 1$ ,  
374 so by the induction hypothesis, there exist  $x_2, \dots, x_s$  for  $s = f_k(\lfloor d/k \rfloor - 1)$  that are multi-class  
375 threshold shattered. By construction, the set  $\{x_1, \dots, x_s\}$  is multi-class threshold shattered by  $\mathcal{H}$ , as  
376 desired.  $\square$

## 377 B Multiclass Trichotomy

378 The Natarajan dimension is one popular generalization of the VC dimension to the multiclass setting.

379 **Definition B.1** ([Nat89]). Let  $\mathcal{X}$  and  $\mathcal{Y}$  be sets, let  $\mathcal{H} \subseteq \mathcal{Y}^{\mathcal{X}}$ , let  $d \in \mathbb{N}$ , and let  $X = \{x_1, \dots, x_d\} \subseteq$   
380  $\mathcal{X}$ . We say that  $\mathcal{H}$  Natarajan-shatters  $X$  if there exist  $f_0, f_1 : X \rightarrow \mathcal{Y}$  such that:

- 381 1.  $\forall x \in X : f_0(x) \neq f_1(x)$ ; and
- 382 2.  $\forall A \subseteq X \exists h \in \mathcal{H} \forall x \in X : h(x) = f_{\mathbb{1}(x \in A)}(x)$ .

383 The Natarajan dimension of  $\mathcal{H}$  is  $\text{ND}(\mathcal{H}) = \sup \{|X| : X \subseteq \mathcal{X} \text{ finite} \wedge \mathcal{H} \text{ Natarajan-shatters } X\}$ .

384 We show the following generalization of Theorem 4.1 for the multiclass setting.

385 **Theorem B.2 (Formal Version of Theorem 5.1)**. Let  $\mathcal{X}$  and  $\mathcal{Y}$  be sets with  $k = |\mathcal{Y}| < \infty$ , let  
386  $\mathcal{H} \subseteq \mathcal{Y}^{\mathcal{X}}$ , and let  $n \in \mathbb{N}$  such that  $n \leq |\mathcal{X}|$ .

- 387 1. If  $\text{ND}(\mathcal{H}) = \infty$  then  $M(\mathcal{H}, n) = n$ .
- 388 2. Otherwise, if  $\text{ND}(\mathcal{H}) = d < \infty$  and  $\text{LD}(\mathcal{H}) = \infty$  then

$$\max\{\min\{d, n\}, \lfloor \log(n) \rfloor\} \leq M(\mathcal{H}, n) \leq O(d \log(nk/d)). \quad (5)$$

389 The  $\Omega(\cdot)$  and  $O(\cdot)$  notations hide universal constants that do not depend on  $\mathcal{X}$ ,  $\mathcal{Y}$  or  $\mathcal{H}$ .

- 390 3. Otherwise, there exists a number  $C(\mathcal{H}) \in \mathbb{N}$  (that depends on  $\mathcal{X}$ ,  $\mathcal{Y}$  and  $\mathcal{H}$  but does not  
391 depend on  $n$ ) such that  $M(\mathcal{H}, n) \leq C(\mathcal{H})$ .

392 The proof of Theorem B.2 uses the following generalization of the Sauer–Shelah–Perles lemma.

393 **Theorem B.3** ([Nat89]; Corollary 5 in [HL95]). Let  $d, n, k \in \mathbb{N}$ , let  $\mathcal{X}$  and  $\mathcal{Y}$  be sets of cardinality  
394  $n$  and  $k$  respectively, and let  $\mathcal{H} \subseteq \mathcal{Y}^{\mathcal{X}}$  such that  $\text{ND}(\mathcal{H}) \leq d$ . Then

$$|\mathcal{H}| \leq \sum_{i=0}^d \binom{n}{i} \binom{k+1}{2}^i \leq \left(\frac{enk^2}{d}\right)^d.$$

395 *Proof of Theorem B.2.* Items 1 and 3 and the  $\min\{d, n\}$  lower bound in Item 2 follow similarly to  
396 the corresponding items in Theorem 4.1. The upper bound in Item 2 also follows similarly to the  
397 corresponding item in Theorem 4.1, except that it uses Theorem B.3 instead of the Sauer–Shelah–  
398 Perles lemma.

399 The  $\lfloor \log(n) \rfloor$  lower bound in Item 2 follows from Theorem A.5 and Claim A.4.  $\square$
